# Supplementary material for: Fabrication of nanocapsules with Au particles trapped inside carbon and silica nanoporous shellsElectronic supplementary information (ESI) available: experimental section and TEM image of Au-entrapping silica capsules-1. See http://www.rsc.org/suppdata/cc/b2/b211714b/
Source: Royal Society of Chemistry journal article supplement (doi:10.1039/b211714b), 2003-02-17

***Electronic supplementary information for Chemical Communications***

This journal is © The Royal Society of Chemistry 2002

Communication Ref.: B211714B   (E-Submission Web Password: 588222

“Fabrication of nanocapsules with Au particles trapped inside carbon and silica nanoporous shells”

Jeong Yeon Kim, Suk Bon Yoon, and Jong-Sung Yu*

Department of Chemistry, Hannam University, Taejon, 306-791, Korea

E-mail: [**jsyu@mail.hannam.ac.kr**](mailto:jsyu@mail.hannam.ac.kr)

## Experimental Section

*Preparation of Au-encapsulating silica particles:*

Colloidal gold particles were prepared via the citrate reduction method as described previously.1 Silica-coated gold colloids were prepared based on a previously reported method as follows.2 2.5 mL of a freshly prepared 1 mM aqueous solution of aminopropyltrimethoxysilane (APS) was added to the 500 mL gold sol with vigorous stirring to allow the amine groups to complex with the gold surface. Then, a dilute sodium metasilicate solution of pH 10-11 was added to the APS-modified gold sol with vigorous stirring. The resulting dispersion is then allowed to stand for 24 h, so that the metasilica polymerizes onto the gold particle surface in order to form a silica shell of ca. 4 nm thick. The particles were then treated for further growth or chemical modification of the silica layer. To 500 mL of the sol in 1 : 4 water/ethanol containing the silica coated Au particles is added 0.3 mL of TEOS and 2 mL of ammonia. The solution is allowed to stand for 24 h under mild stirring, and additions are repeated until the desired shell thickness is attained.

1. C. S. Weisbecker, M. V. Merritt and G. M. Whitesides, *Langmuir*, 1996, **12**, 3763.

2. L. M. Liz-Marzán, M. Giersin and P. Mulvaney, *Langmuir*, 1996. **12**. 4329.

*Synthesis of Au-encapsulating solid core/mesoporous shell silica particles:*

A concentrated Au-encapsulating silica in ca. 16 ml of deionized water was added into a solution containing 200 mL of absolute ethanol and 8 mL of aqueous ammonia (28 wt. %). After stirring for 30 min, a mixture containing 1 mL of TEOS and 0.4 mL octadecyltrimethoxysilane (C18-TMS) was added into the Au-encapsulating silica solution and further reacted for 6 h. Excess solvent was removed by centrifugation and the product subsequently dried at 343 K, and further calcined at 823 K for 7 h under oxygen atmosphere to produce the Au-encapsulating solid core/mesoporous shell (Au-encapsulating SCMS) silica material.

*Synthesis of Au-entrapping hollow core/mesoporous shell carbon capsules:*

The Au-encapsulating SCMS silica was transferred to a reaction flask in a dry box and dried under vacuum at 373K for overnight prior to introduction of the carbon precursor. Mesopores in the Au-encapsulating SCMS silica were filled by soaking each of the samples with a carbon precursor solution of 80 % divinylbenzene (DVB) and a free radical initiator, azobisisobutyronitrile (AIBN) with DVB/AIBN molar ratio of ca. 25. Dissolved oxygen, moisture and excess carbon precursor were removed by several freeze-pump-thaw cycles. Polymerization was completed by heating at 343K for overnight. The resulting polymer/ Au-encapsulating SCMS silica composites were then heated under nitrogen (or argon ) gas flow at a heating rate of 5 K/min to 973 K and then held under these conditions for 7 h to carbonize the polymer. The resulting Au-entrapping hollow core/mesoporous shell (Au-entrapping HCMS) carbon capsules were obtained after subsequent dissolution of the silica framework in 48 % aqueous HF solution.

*Synthesis of Au-entrapping silica capsules with mesoporous or microporous shell:*

After the Au-entrapping HCMS carbon capsules had been dried at 423 K for overnight under vacuum, tetraethylorthosilicate (TEOS) was allowed to penetrate into the mesopores of the Au-entrapping HCMS carbon capsules for ca. 3 h. The excess silica precursor was then removed by multiple evacuations at ambient temperature. Subsequently, the Au-entrapping carbon capsule/silica precursor composites were exposed to HCl vapor by placing them in a sealed chamber containing aqueous 1.0 M HCl and maintained at temperature at 373 K for 24 h in order to induce acid-catalyzed hydrolysis and condensation of the silicate precursor. The carbon/silica composite was heated under nitrogen gas flow first at a heating rate of 5 K/min to 773 K (in order to maintain carbon framework during hydrolysis and condensation of the silicate precursor), then under oxygen gas flow at a heating rate of 5 K/min to 873 K and finally held under these conditions for 7 h under oxygen to remove the carbon framework. This generated Au-entrapping hollow core/mesoporous shell silica capsules. In an alternate procedure, the Au-entrapping carbon capsule/silica precursor composites were exposed to the moisture in air at ambient temperature for 24 h instead of HCl vapor. The carbon/silica composites were heated directly under oxygen gas flow at a heating rate of 5 K/min to 873 K and then held under these conditions for 7 h under oxygen to remove the carbon framework. The resulting silica capsules possessed a microporous shell, and were denoted Au-entrapping silica capules-1. In this case, the hydrolysis and condensation of the silicate precursor might be incomplete. The direct burning of carbon/silica composite framework under oxygen gas might cause more shrinkage of silica framework. In fact, roughly 25 % and 40 % shrinkages were observed in the core and shell size in this case compared to ca 5 % and 20 % shrinkage in the Au- entrapping silica capsules with mesoporous shell from the beginning Au-SCMS silica capsules. These two different treatments eventually resulted in the synthesis of Au-entrapping silica capsules with different porosities in the shell as determined in BET isotherms and pore size distribution.


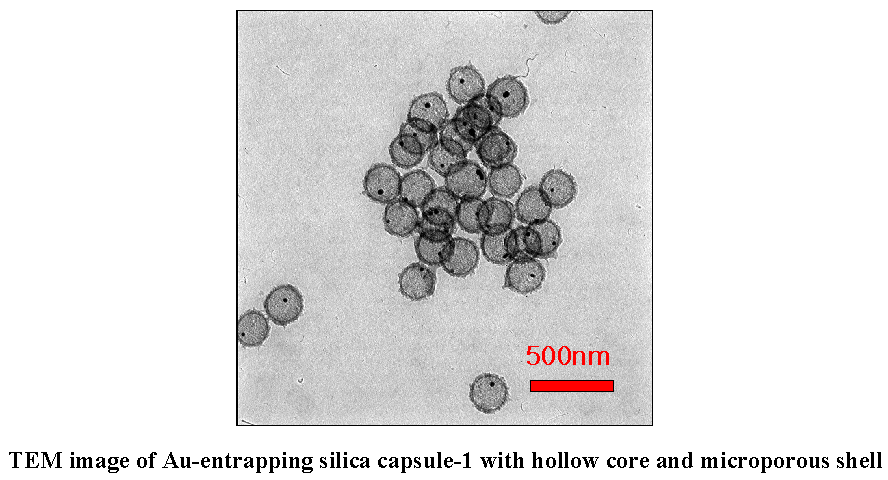

Supplement: b211714b.doc [file b211714b.doc]
